# Supplementary material
Source: Springer Nature journal article supplement (https://www.springermedizin.de/resource/supplementary/12916_2013_910_MOESM5_ESM.pdf/9598806)
Supplement: MOESM5 [file 9598806]

### Search terms

Verbal autopsy; cause of death; validity; validation; performance; accuracy; assessment

### Databases searched and number of citations found

1) PubMed- 595

2) Popline- 80

3) LILACS- 9

4) Embase- 0

Studies excluded from the review  
(n = 665)

- 90% of studies excluded at the stage of reviewing titles and abstracts for general relevance
- Remaining studies excluded during review of full texts for not fitting the eligibility criteria

Studies included in the review  
(n = 19)
